33. Vincent A, Brimmer DJ, Whipple MO, Jones JF, Boneva R, Lahr BD, Maloney E, St Sauver JL, Reeves WC: Prevalence, incidence, and classification of chronic fatigue syndrome in Olmsted County, Minnesota, as estimated using the Rochester Epidemiology Project. *Mayo Clin Proc* 2012; 87:1145–52
34. Brummett CM, Clauw DJ: Flipping the Paradigm: From surgery-specific to patient-driven perioperative analgesic algorithms. *ANESTHESIOLOGY* 2015; (in press)
35. Bruehl S, Burns JW, Gupta R, Buvanendran A, Chont M, Schuster E, France CR: Endogenous opioid inhibition of chronic low-back pain influences degree of back pain relief after morphine administration. *Reg Anesth Pain Med* 2014; 39:120–5
36. Bruehl S, Burns JW, Gupta R, Buvanendran A, Chont M, Kinner E, Schuster E, Passik S, France CR: Endogenous opioid function mediates the association between laboratory-evoked pain sensitivity and morphine analgesic responses. *Pain* 2013; 154:1856–64
37. Eisenach JC, Houle TT: Replication to advance science: Changes in *ANESTHESIOLOGY*. *ANESTHESIOLOGY* 2014; 121:209–11

## ANESTHESIOLOGY REFLECTIONS FROM THE WOOD LIBRARY-MUSEUM

### John Bonica's Presentation Copy to Capt. Thomas Robbins

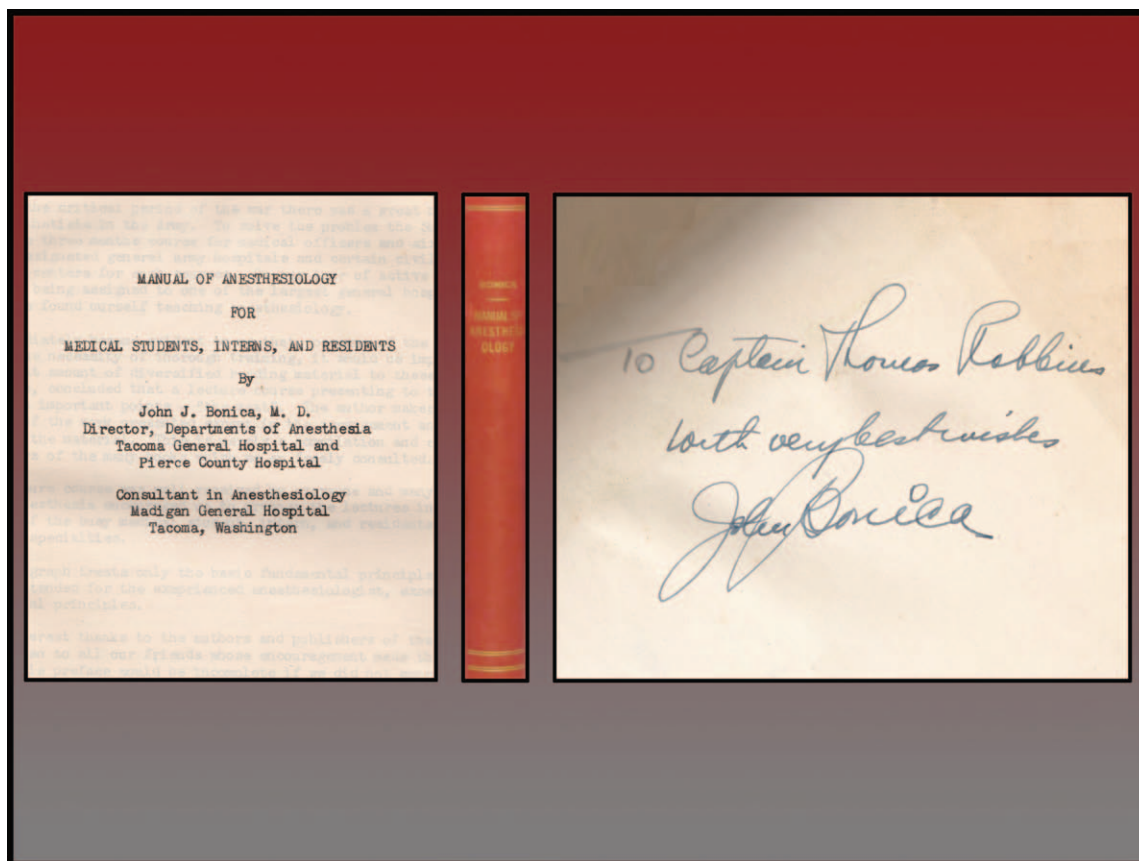

Before chairing the Department of Anesthesiology in 1960 at the University of Washington, Dr. John J. Bonica directed "Departments of Anesthesia" at Tacoma General Hospital and Pierce County Hospital. For trainees at those facilities, Dr. Bonica bound (left and middle) typewritten pages into a red volume titled *Manual of Anesthesiology for Medical Students, Interns, and Residents*. Anesthesia mentor Bonica presented this manual "with very best wishes" (right) to a Captain Thomas Robbins. After I won this presentation volume on an internet auction, I decided to donate this "manual" to the Wood Library-Museum in memory of another Bonica disciple, Richard G. Black, M.D., who mentored me patiently for 6 months on pain management and regional anesthesia for the elderly, during my Hopkins–National Institutes of Health fellowship in geriatric anesthesiology. (Copyright © the American Society of Anesthesiologists, Inc.)

George S. Bause, M.D., M.P.H., Honorary Curator, ASA's Wood Library-Museum of Anesthesiology, Schaumburg, Illinois, and Clinical Associate Professor, Case Western Reserve University, Cleveland, Ohio. UJYC@aol.com.
